# Supplementary material
Source: publisher figshare collection journal article supplement (https://tandf.figshare.com/ndownloader/files/22581899)
Supplement: Supplementary file 1 [file 22581899]

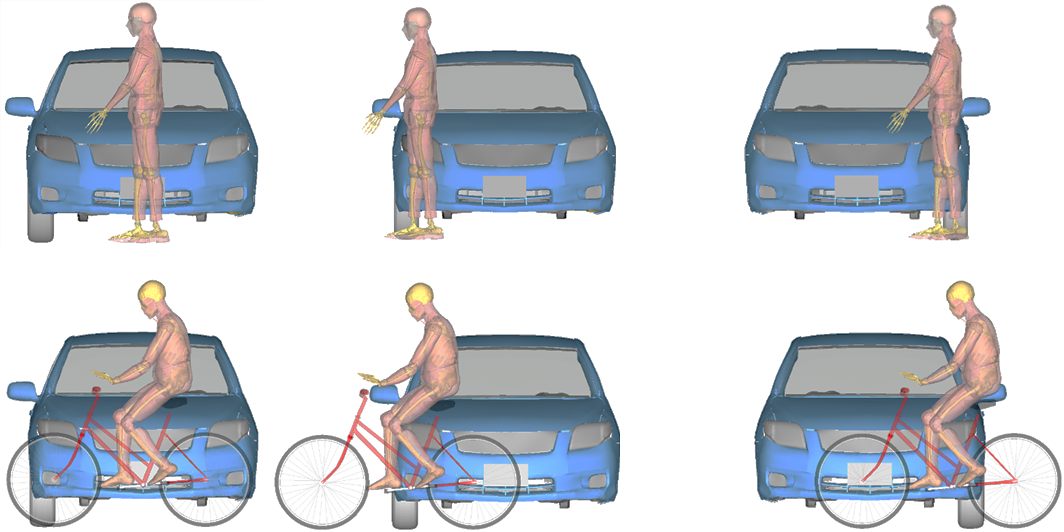

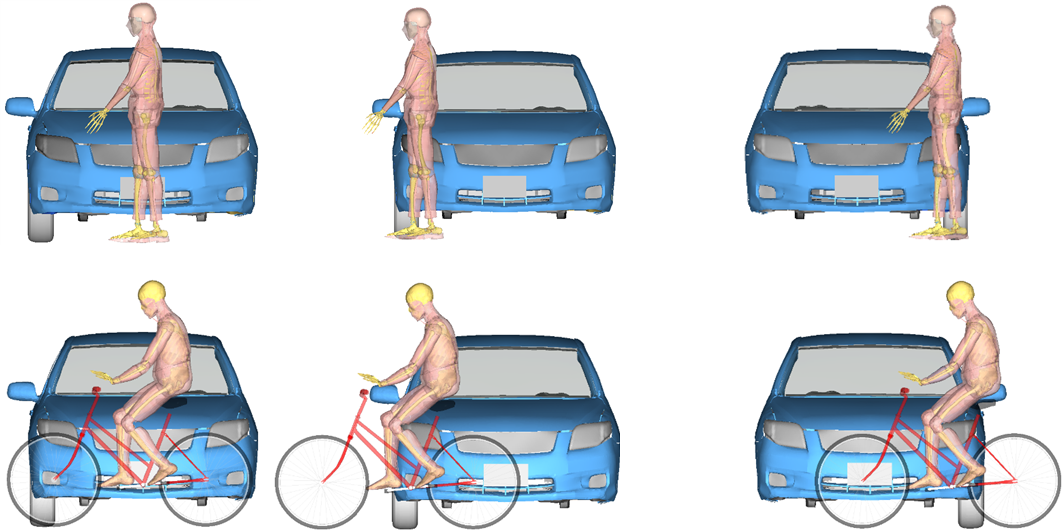

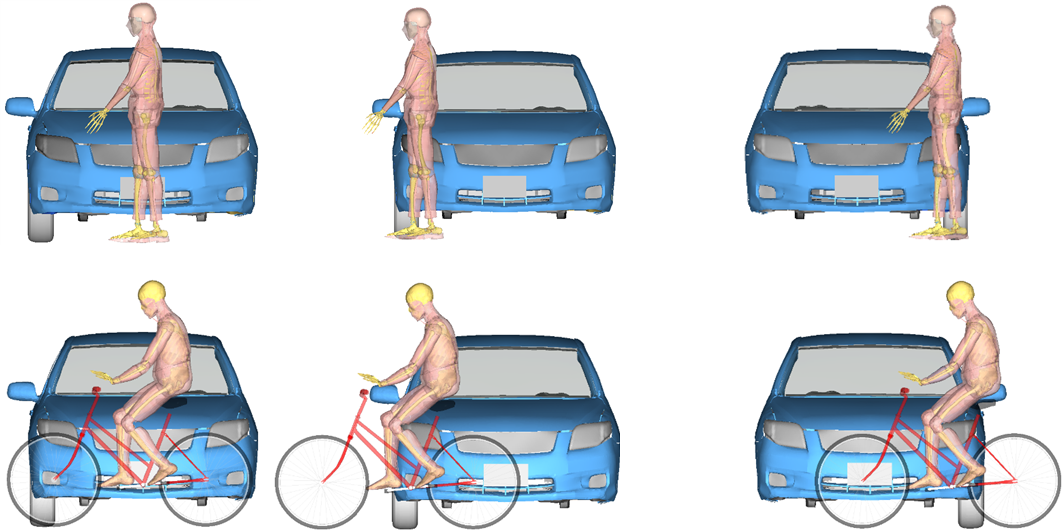

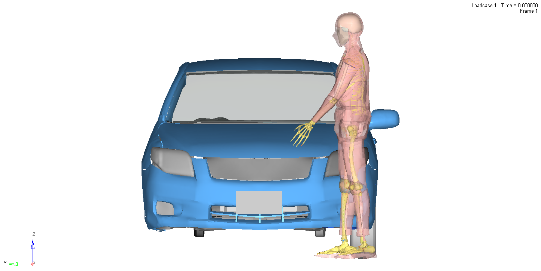


650 mm

650 mm

Case1

Pedestrian/Car right front

Case2

Pedestrian/Car front center

Case3

Pedestrian/Car left front

Case4

Cyclist/Car right front

Case5

Cyclist/Car front center

Case6

Cyclist/Car left front

*z*

*y*

*z*

*y*

**Fig. A1** Simulation matrix of car-to-pedestrian and car-to-cyclist collisions in the right, center and left of car locations


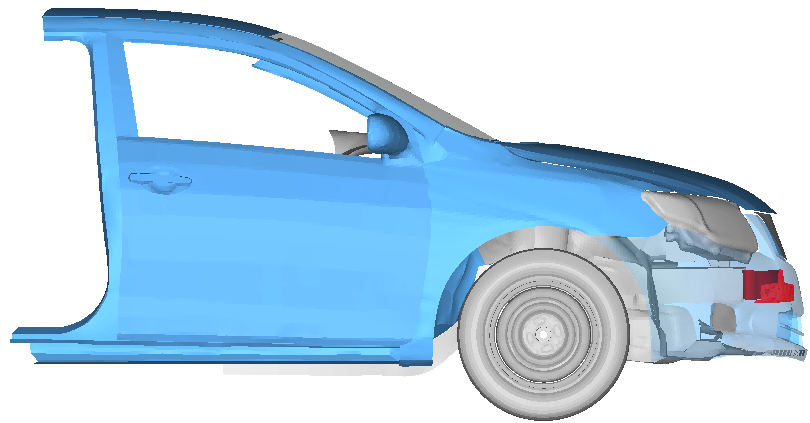


920

208

414

528

760

144

760

859

26.8°

14.3°

**Fig. A2** Dimensions of small car model (unit: mm)

*ω*

*x*

*z*

Sacrum

T1

CG

tibia/hood

*θy*

**Fig. A3** The impulse applied to the cyclist from the car

**Fig. A4** Contact force, acceleration and impulse-time history of pedestrian in vehicle forward direction (Case2: pedestrian/car front center collision)

**Fig. A5** Contact force, acceleration and impulse-time history of pedestrian in vehicle upward direction (Case2: pedestrian/car front center collision)

Windshield

Hood

Bumper

Bumper

Hood

Cowl

Windshield

Angular impulse (Nm⋅s)

Time (ms)

Stage 1

Stage 3

Stage 2

Pelvis

Sum

Tibia (R)

Femur (R)

UX (R)

UX (L)

Chest

Head

Tibia (L)

Femur (L)

**Fig. A6** Angular impulse of pedestrian (Case2: pedestrian/car front center collision)


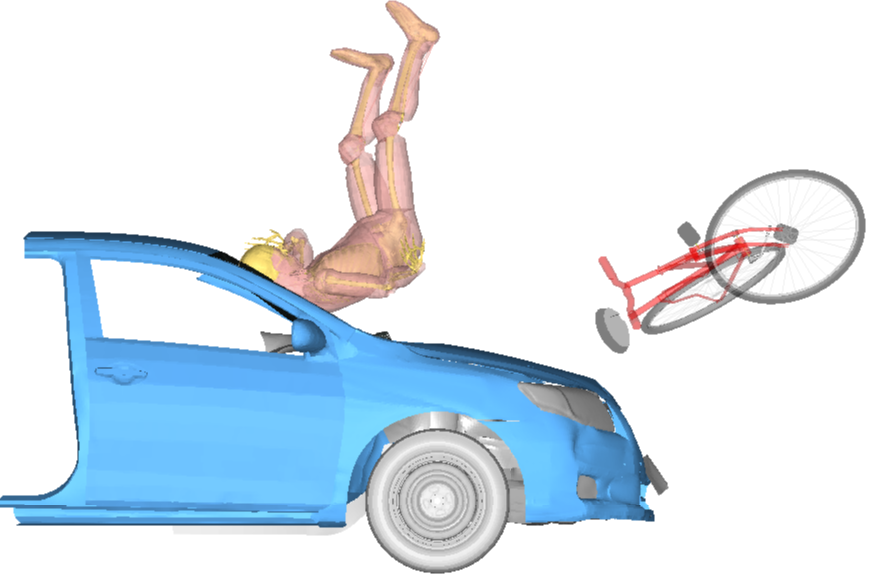

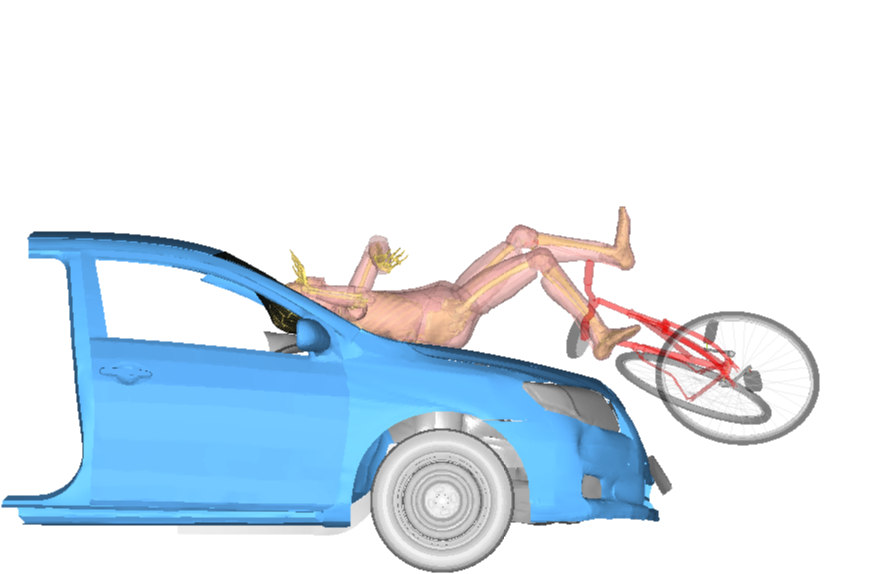


170 ms

300 ms


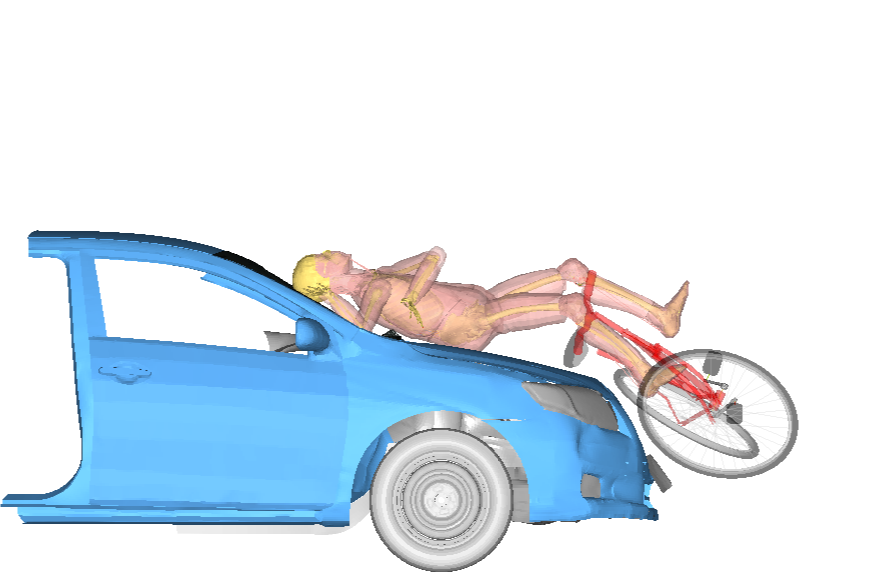


0 ms

60 ms

140 ms

30 ms

*z*

*x*

Stage 1: Forward impulse

Stage 2: Cyclist rotation


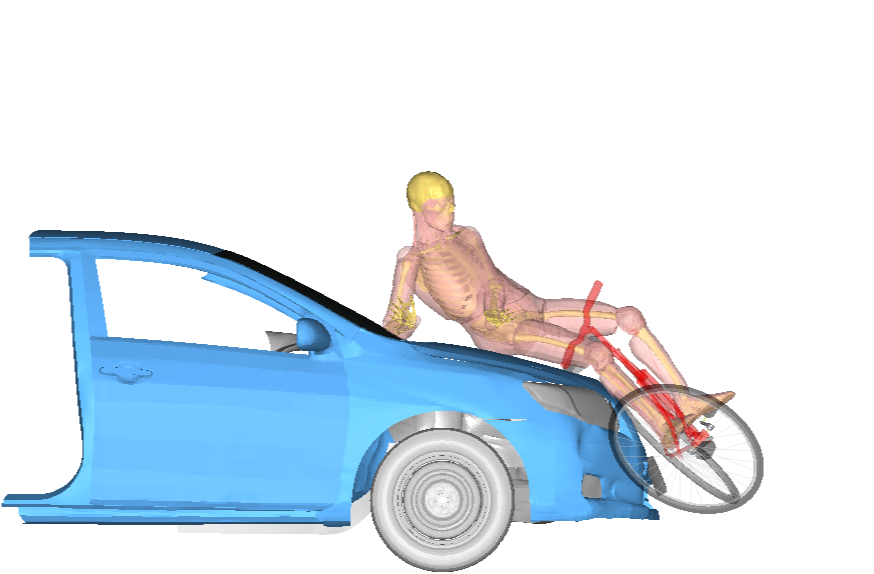


100 ms

Stage 3: Forward and upward impulse

Separation

80 ms


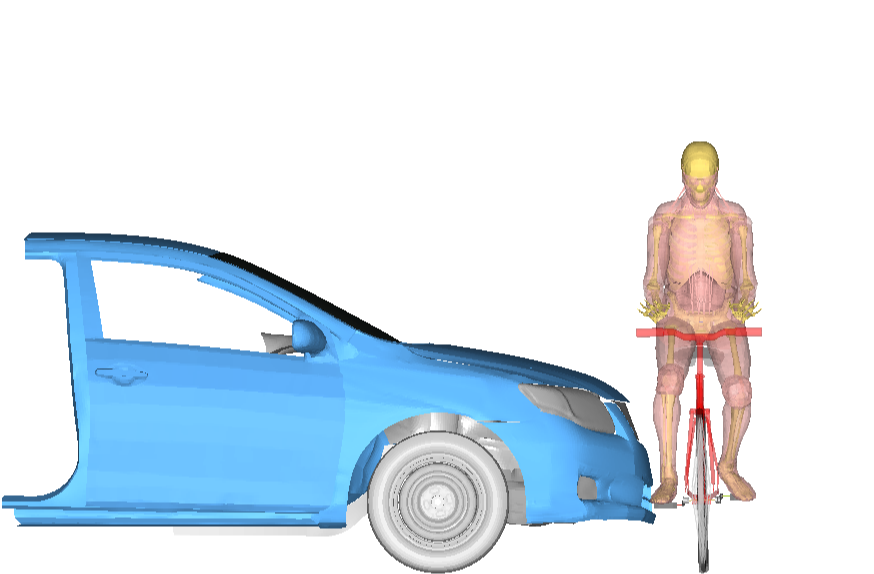

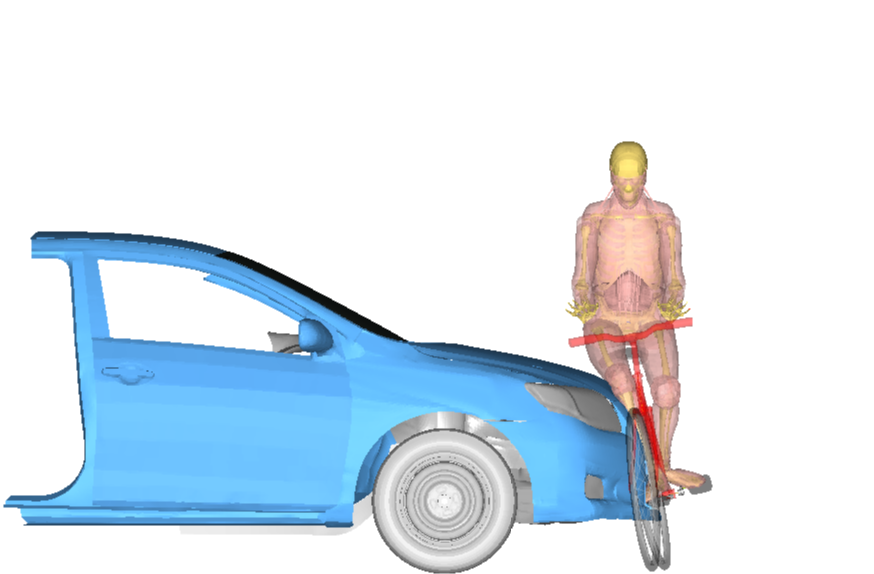

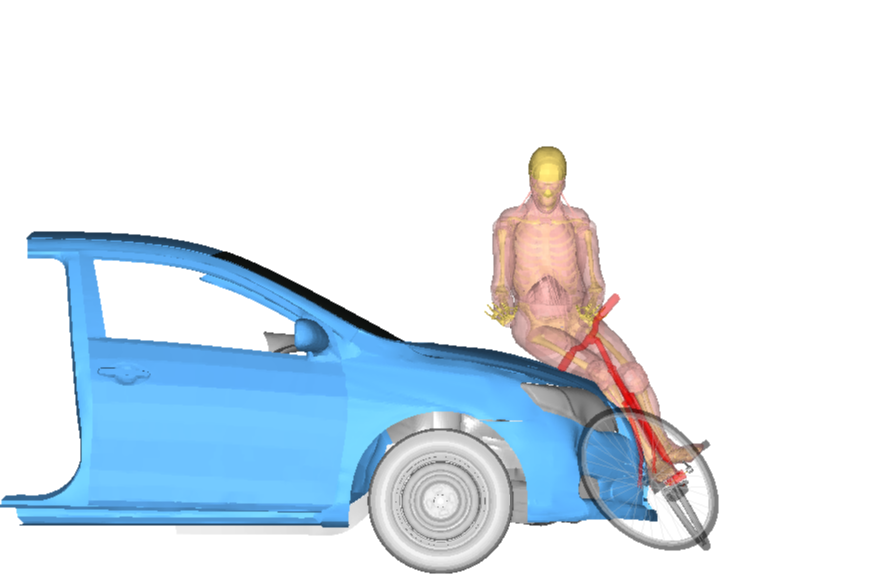

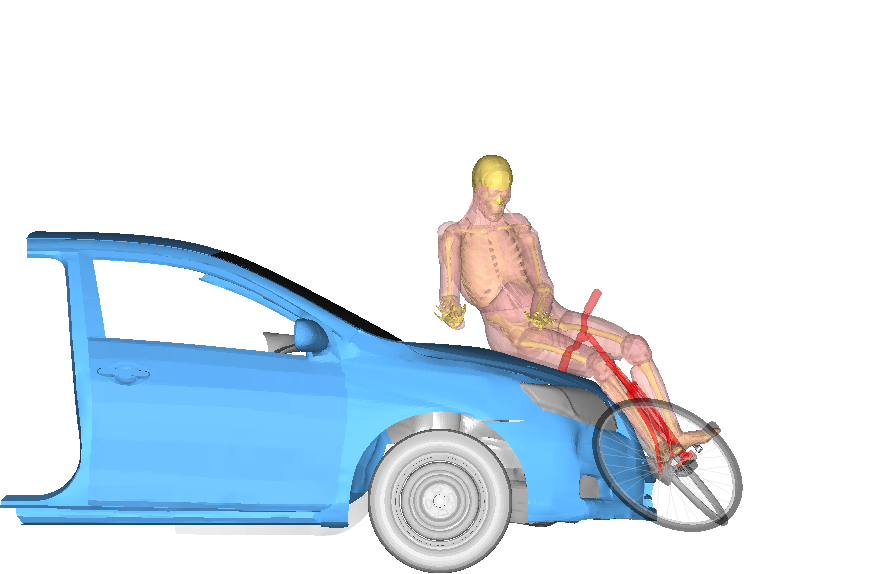


**Fig. A7** Kinematic behavior of cyclist in collisions at 40 km/h

(Case5: cyclist/car front center collision)

Bicycle

Hood

Hood

Bumper

Bicycle

Windshield

Impulse (Ns)

(75 kg×11.1 m/s)

Time (ms)

Stage 1

Stage 3

Stage 2

Pelvis

Sum

Tibia (R)

Femur (R)

UX (R)

UX (L)

Chest

Head

Tibia (L)

Femur (L)

(a) Impulse in forward direction (*x*)

Bicycle

Hood

Hood

Cowl

Bicycle

Windshield

Impulse (Ns)

Time (ms)

Stage 1

Stage 3

Stage 2

(b) Impulse in upward direction (*z*)

**Fig. A8** Impulse of cyclist applied from car in the car forward and upward direction (Case5: Cyclist/car front center collision)

Impulse (Ns)

(=75 kg×11.1 m/s)

Pelvis

Sum

Tibia (R)

Femur (R)

UX (R)

UX (L)

Chest

Head

Tibia (L)

Femur (L)

Sum689

747

674

458

598

547

Pelvis

LX

Chest+UX

Head

(a) Impulse in the forward direction

Impulse (Ns)

Chest+UX

309

358

329

445

393

Pelvis

LX

Head

348

(b) Impulse in the upward direction

**Fig. A9** Impulses of pedestrian applied from car in the car forward and upward direction at the time of pedestrian/cyclist separating from the car

Angular impulse (Nm⋅s)

Torso angular velocity (rad/s)

Pedestrian/Car center

Pedestrian/Car left

Pedestrian/Car right

Cyclist/Car center

Cyclist/Car left

Cyclist/Car right

0

1

2

3

4

5

6

7

8

0

10

20

30

40

50

60

70

80

**Fig. A10** The torso angular velocity vs. the total angular impulse around the pelvis at the time of pedestrian/cyclist separating from the car
